# Supplementary material for: Multilayered Omics-Based Analysis of a Head and Neck Cancer Model of Cisplatin Resistance Reveals Intratumoral Heterogeneity and Treatment-Induced Clonal Selection
Source: Oxford University Press journal article supplement (doi:10.1158/1078-0432.ccr-17-2410), 2017-10-23
Supplement: 10780432ccr172410-sup-187915_2_supp_4318614_7xjm32.xlsx [file 10780432ccr172410-sup-187915_2_supp_4318614_7xjm32.xlsx]

## Sheet: differential (>2-fold)
Supplementary File 3: Differentially expressed phosphopeptides associated with a CDDP-resistant phenotype
			normalized expression values (log2)					fold change (log2)
Gene	uniprot	phosphosite	internal standard	clone 5	clone 78	clone 46	clone 54	clone 5 vs clone 54	clone 5 vs clone 46	clone 78 vs clone 46	clone 78 vs clone 54	Number of pairs with ≥2-fold change
NFRKB	Q6P4R8-3	S1290	21.6697	23.5858	21.2389	NA	NA					4
AHNAK	Q09666	S5752	23.8981	24.1237	23.728	21.7575	22.4229	1.70075	2.36616	1.97046	1.30505	4
ANXA2	P07355	T19	26.9601	27.3569	28.3765	25.3453	26.2384	1.11849	2.01154	3.03114	2.13809	4
DFFA	O00273	S315	24.9628	25.9821	25.3687	24.2728	23.7624	2.21964	1.70922	1.09584	1.60626	4
FARP1	A0A1B0GV68	S427	24.4689	25.4514	25.7248	23.3033	23.2323	2.21908	2.14807	2.4215	2.49251	4
FARP1	A0A1B0GV68	T24	26.5599	27.1145	27.2236	25.7019	25.5858	1.52869	1.41257	1.5217	1.63782	4
KRT15	P19012	S56	25.7898	27.3553	24.2434	22.5053	22.6318	4.72352	4.84997	1.73808	1.61163	4
KRT19	P08727	S13	27.5785	28.5548	28.0867	26.3437	26.4518	2.10306	2.2111	1.74294	1.6349	4
KRT19	P08727	S22	26.6718	27.1514	26.8434	25.6357	25.4295	1.72188	1.51561	1.20767	1.41394	4
KRT5	P13647	S62	25.779	27.2044	25.5164	24.2233	23.0419	4.16245	2.98105	1.29305	2.47445	4
PDLIM2	C9JSR2	S129	27.6499	28.5041	28.2011	26.0114	23.5995	4.90462	2.49269	2.18969	4.60162	4
PRKD1	Q15139	S205	24.6259	25.2332	25.4863	22.7954	23.743	1.49012	2.43774	2.69085	1.74323	4
ANK1	H0YBS0	S846	25.3752	27.1719	25.4176	23.6749	25.0711	2.10076	3.49697	1.74266	0.34645	3
BAP18	Q8IXM2-2	S62	26.2002	26.8562	26.1822	25.7806	24.9224	1.93382	1.0756	0.40156	1.25978	3
BIN1	O00499-9	S267	24.1269	23.7826	24.8114	22.3131	22.8278	0.95475	1.46954	2.49835	1.98356	3
BIN1	O00499-9	S272	24.1576	24.5714	23.7955	22.7867	23.1272	1.44424	1.78466	1.00876	0.66834	3
CDK12	Q9NYV4-2	T692	24.7302	25.7544	25.2858	24.2279	24.6339	1.12052	1.52654	1.05792	0.6519	3
CHAMP1	Q96JM3	S405	23.9747	25.1061	23.4444	23.2043	22.2377	2.86845	1.90182	0.24004	1.20667	3
COIL	P38432	S566	25.4282	25.0283	26.4526	25.0989	23.7024	1.32594	-0.07057	1.3537	2.75021	3
FKBP3	Q00688	S36	24.8727	24.8992	26.182	25.0111	23.2835	1.61572	-0.11185	1.17099	2.89856	3
KRT13	P13646	S427	31.6258	33.4827	29.329	27.8281	28.5912	4.89148	5.65452	1.50089	0.73785	3
KRT15	P19012	S34	24.9687	26.5673	24.2655	23.6329	23.0495	3.51777	2.93442	0.63264	1.21599	3
KRT5	P13647	S26	27.108	28.2373	26.2107	24.684	25.2906	2.94669	3.55328	1.52669	0.9201	3
KRT5	P13647	S36	31.828	32.6327	31.9423	31.436	24.928	7.70471	1.19663	0.50628	7.01436	3
KRT5	P13647	S567	28.6085	29.6898	28.1062	27.708	26.0566	3.63327	1.98182	0.39818	2.04963	3
MTA1	H0Y4T7	S368	24.4589	25.2437	25.4899	24.4726	23.203	2.04074	0.77111	1.01724	2.28687	3
NCOR1	E7EVK1	S751	26.6325	26.3177	26.8233	24.7621	25.4763	0.84139	1.55556	2.06121	1.34704	3
PDHA1	P08559-3	S262	27.9067	28.077	28.6713	27.5195	26.8561	1.22094	0.55759	1.15185	1.8152	3
PRPF40A	O75400-2	T346	22.9683	22.2917	23.0948	18.9402	21.7302	0.56141	3.35147	4.15465	1.36459	3
CBX8	Q9HC52	S311	23.3479	22.1904	22.4544	23.4988	24.1713	-1.98091	-1.30843	-1.0444	-1.71688	4
CLIP1	J3KP58	S204	25.8138	24.3042	24.5682	27.8221	25.6608	-1.35668	-3.51792	-3.25389	-1.09265	4
DDX39A	O00148	T171	24.6029	23.4196	23.24	24.5634	25.0007	-1.5811	-1.14384	-1.32343	-1.76069	4
DDX59	Q5T1V6-2	S160	22.7016	21.1092	20.36	22.3012	23.9143	-2.80516	-1.19208	-1.94129	-3.55437	4
DSG2	Q14126	T922	24.3949	22.8749	21.7643	24.5619	26.184	-3.30911	-1.68693	-2.79755	-4.41973	4
FAM65A	H3BMG9	S36	26.7968	25.2932	24.7698	27.2174	26.6852	-1.39197	-1.92418	-2.4476	-1.91539	4
GAPVD1	H0Y4E7	S739	26.857	25.8818	26.057	27.2382	27.1958	-1.31402	-1.35638	-1.18115	-1.13879	4
HSPB1	P04792	S82	27.9888	27.4766	24.3538	28.6909	28.4883	-1.01174	-1.21431	-4.33713	-4.13456	4
IKBKB	O14920-4	S613	24.5219	22.8505	21.3523	24.8617	23.9468	-1.09629	-2.01117	-3.5094	-2.59452	4
KLC3	Q6P597-2	S465	24.3765	23.4741	23.4394	24.4943	24.6968	-1.22277	-1.02019	-1.05485	-1.25743	4
KLC3	Q6P597-2	S496	27.6777	26.3944	26.6077	28.1884	27.9157	-1.52126	-1.79392	-1.5807	-1.30804	4
MARCKS	P29966	S101	23.8031	23.1522	22.3942	24.5185	24.6576	-1.50537	-1.36626	-2.12423	-2.26334	4
NOP2	P46087-2	S782	26.9077	26.5826	25.6726	27.6398	28.1072	-1.52462	-1.0572	-1.96725	-2.43467	4
PFKFB2	O60825	S466	28.538	27.9138	27.149	29.1883	28.9949	-1.0811	-1.2745	-2.0393	-1.8459	4
PPP4R4	Q6NUP7	S775	22.1288	18.4334	22.3127	23.8946	23.6634	-5.22996	-5.46125	-1.58191	-1.35062	4
SQSTM1	Q13501-2	T185	27.3452	25.8028	26.0368	28.1471	28.4477	-2.64486	-2.34426	-2.11031	-2.41091	4
ZYX	Q15942	S344	28.6666	27.8801	27.4168	29.6866	29.1987	-1.31861	-1.80653	-2.26981	-1.78189	4
HELZ2	Q9BYK8	S338	24.9637	NA	NA	28.3768	25.1772					4
LCP1	P13796	S5	25.833	NA	NA	27.575	25.177					4
SLC4A1AP	A0A087WWF4	S28	22.9174	NA	NA	23.5086	24.5875					4
AAK1	E9PG46	S637	27.5154	26.396	26.1648	27.479	27.3235	-0.92751	-1.08305	-1.31423	-1.15869	3
CFL1	P23528	S3	26.5741	26.4309	24.7023	26.1347	27.63	-1.1991	0.29621	-1.43233	-2.92764	3
COL17A1	A2A2Y8	S61	26.7337	25.6552	26.2921	27.3772	26.9751	-1.31998	-1.72205	-1.08514	-0.68307	3
DTX3L	Q8TDB6	S202	28.3129	27.4831	25.6113	29.348	28.1002	-0.61712	-1.86491	-3.73675	-2.48896	3
FUBP1	Q96AE4	T153	24.9075	22.5519	24.69	25.7786	24.8303	-2.27834	-3.22672	-1.08859	-0.14021	3
GAB1	Q13480-2	S547	24.7338	22.9499	23.966	25.6311	24.5261	-1.57627	-2.68127	-1.66514	-0.56014	3
IFIT3	O14879	S203	26.2942	22.097	25.6499	27.5902	23.9733	-1.87634	-5.49316	-1.94029	1.67653	3
IRF2BP2	Q7Z5L9-2	S175	27.9597	27.5075	27.0455	28.8234	28.3963	-0.88883	-1.31589	-1.77784	-1.35078	3
NHSL1	Q5SYE7-2	S324	26.6431	22.963	26.4502	27.6152	23.9985	-1.03556	-4.6522	-1.16501	2.45163	3
PKP4	Q99569-2	S314	27.3252	27.0996	26.3001	28.313	27.3316	-0.23195	-1.2134	-2.01292	-1.03147	3
PLEKHG3	A1L390-3	S377	25.429	23.3619	24.598	26.2309	25.5926	-2.23078	-2.86903	-1.63286	-0.99461	3
PLEKHG3	A1L390-3	S771	25.4183	24.7975	24.447	26.819	25.7688	-0.97126	-2.02148	-2.37194	-1.32172	3
PUM1	E9PR38	T112	25.6694	24.0869	25.7118	26.722	25.6668	-1.57995	-2.63513	-1.01017	0.04501	3
RAB3IL1	E9PK89	S226	26.5159	25.2673	24.3988	26.2366	26.7407	-1.47341	-0.96932	-1.83779	-2.34188	3
SIPA1L1	O43166-3	S255	22.715	22.0542	22.9001	24.0077	23.2607	-1.20645	-1.95347	-1.10758	-0.36056	3
SQSTM1	Q13501-2	S188	30.5005	29.0547	29.4337	30.4561	30.4134	-1.35871	-1.40146	-1.02242	-0.97967	3
TCOF1	J3KQ96	S1219	27.1087	26.1859	26.7501	27.3416	27.76	-1.57412	-1.15568	-0.5915	-1.00994	3
THRAP3	Q9Y2W1	S253	23.7935	23.3988	22.9893	24.9061	24.1143	-0.71541	-1.50727	-1.91684	-1.12498	3
TOP2A	P11388	S1213	26.4413	25.6619	26.1324	27.1675	26.8312	-1.16929	-1.50558	-1.03509	-0.6988	3
TRIM33	H0Y612	S880	24.9024	24.8225	24.5394	25.5698	26.6917	-1.86922	-0.74733	-1.03039	-2.15228	3
ZC3H18	Q86VM9	S534	31.0693	31.6752	31.016	32.0455	32.8242	-1.14897	-0.37024	-1.02951	-1.80824	3
